# Supplementary material
Source: PubMed Central journal article supplement (PMC4702224)
Supplement: CJN.02810315_CJN02810315SupplementaryData.pdf [file CJN.02810315_CJN02810315SupplementaryData.pdf]

### Supplemental Data

**Suppl Table 1. Urinary oxalate excretion on follow-up (>60 days after PH diagnosis) and risk of ESRD**

| <b>U<sub>[ox]</sub>, mmol/1.73m<sup>2</sup>/24h (n=165, 33 events)</b> | <b>HR</b>    | <b>95% CI</b> | <b>P-value</b>        |
|------------------------------------------------------------------------|--------------|---------------|-----------------------|
| <b>Linear</b> (unit increase)                                          | 1.76         | 1.24 - 2.51   | <b>0.002</b>          |
| <b>Quartiles</b>                                                       |              |               | <b>0.027</b>          |
|                                                                        |              |               | <b>(0.016, trend)</b> |
| Q1. <0.80                                                              | 1.0 referent |               |                       |
| Q2. 0.80 to <1.23                                                      | 1.18         | 0.28 - 3.69   | 0.78                  |
| Q3. 1.23 to <1.87                                                      | 0.93         | 0.26 - 3.24   | 0.90                  |
| Q4. >1.87                                                              | 3.30         | 1.17 - 9.33   | <b>0.024</b>          |
| <b>U<sub>[ox]</sub> &gt; 1.87 (Q4) vs &lt;1.87 (Q1+Q2+Q3)</b>          |              |               |                       |
| crude                                                                  | 3.18         | 1.53 - 6.58   | <b>0.002</b>          |
| Adjusted for sex, age, eGFR (n=105, 20 events)                         | 4.19         | 1.62 - 10.8   | <b>0.003</b>          |
